# Supplementary material for: Genomic, Proteomic and Morphological Characterization of Two Novel Broad Host Lytic Bacteriophages ΦPD10.3 and ΦPD23.1 Infecting Pectinolytic Pectobacterium spp. and Dickeya spp
Source: PubMed Central journal article supplement (PMC4372400; doi:10.1371/journal.pone.0119812), 2015-03-24
Supplement: pone.0119812.s001.pdf [file pone.0119812.s001.pdf]

S1 Figure

A) The draft genome of bacteriophage  $\phi$ PD10.3

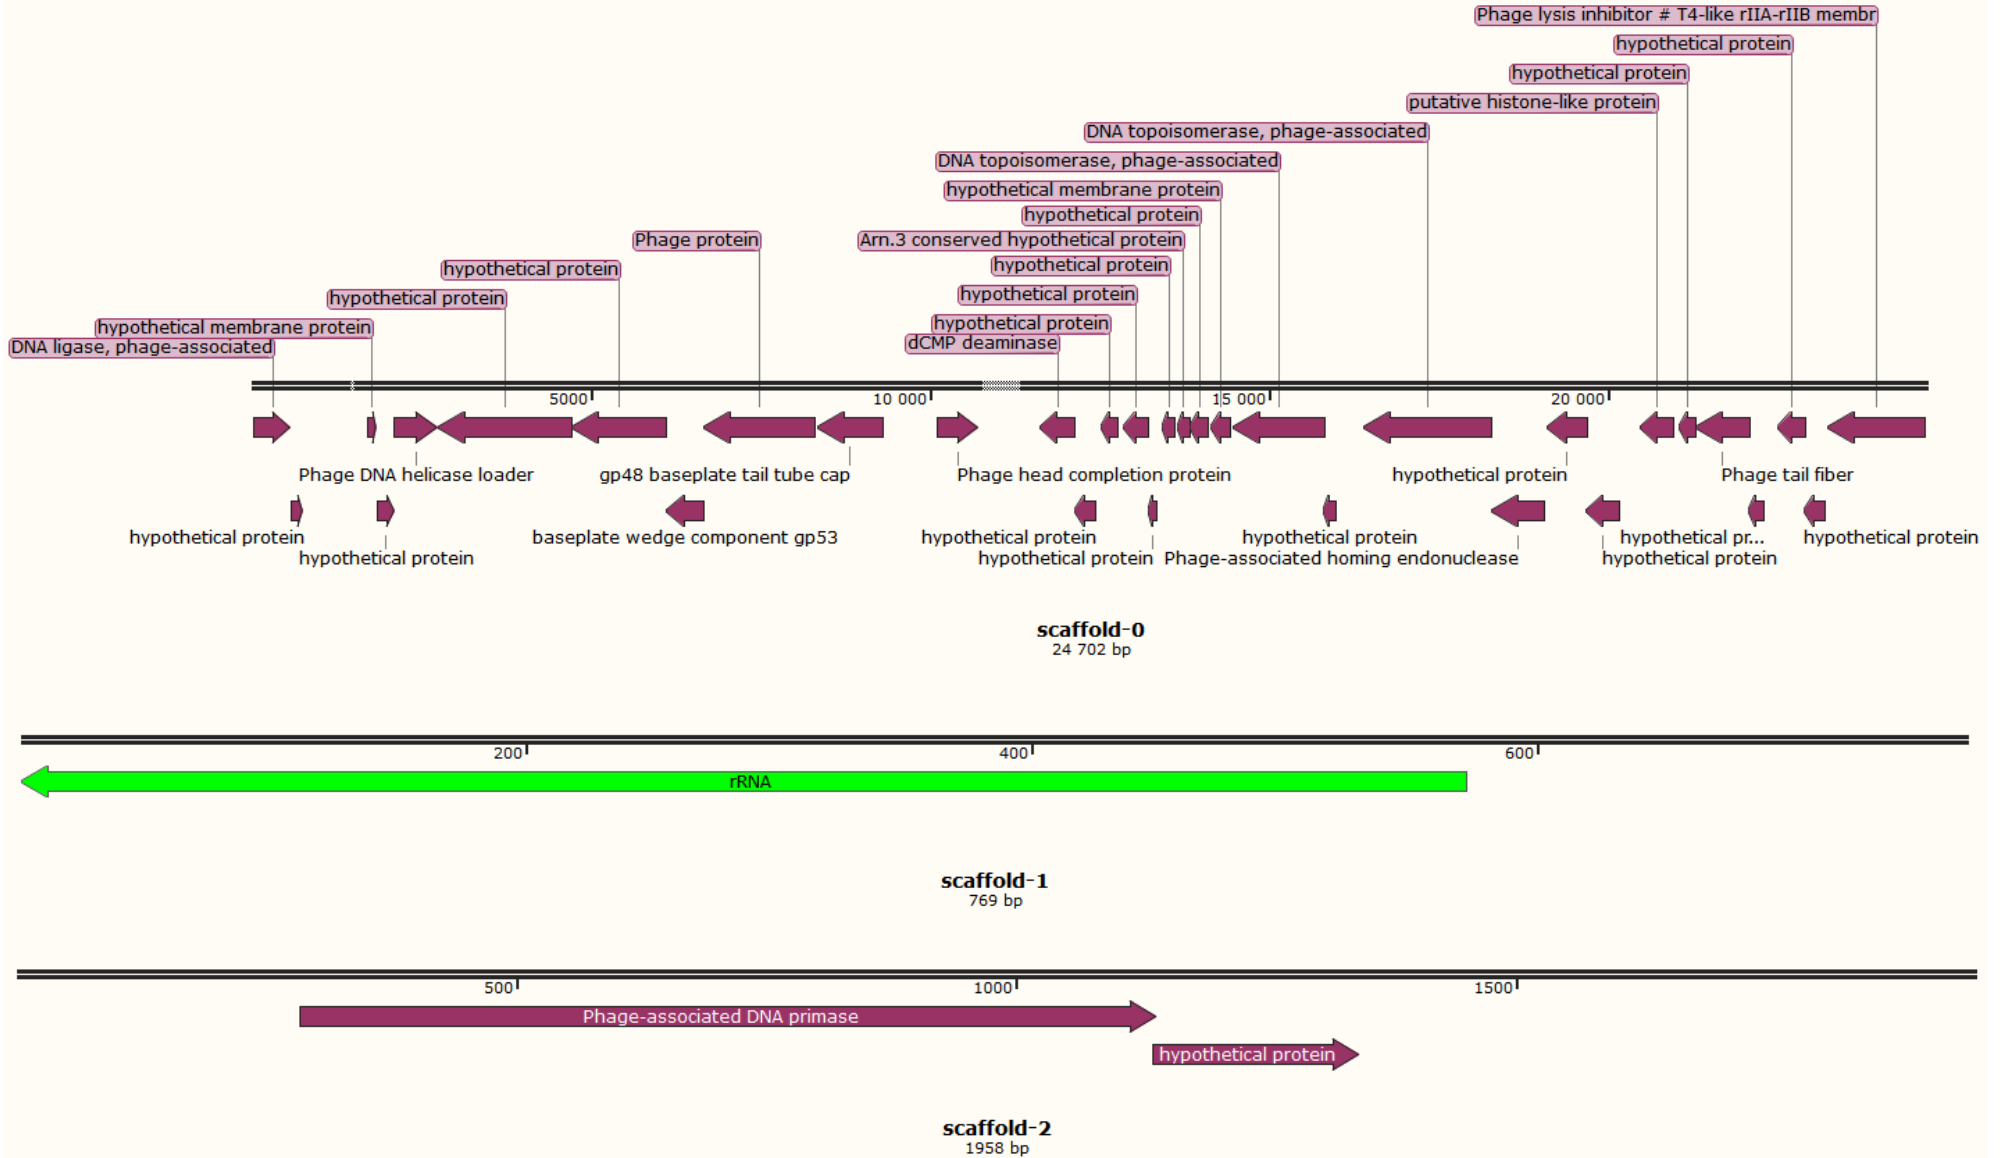

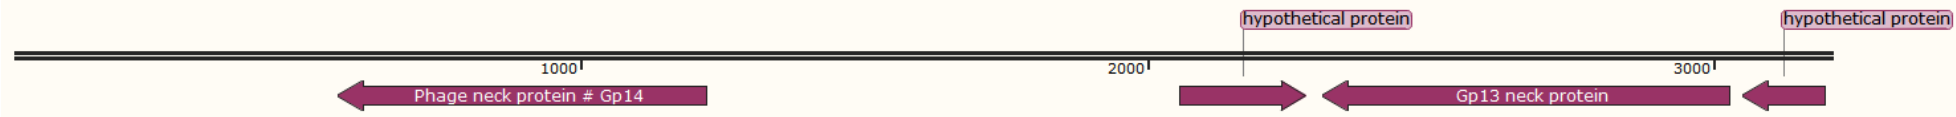

**scaffold-3**  
3207 bp

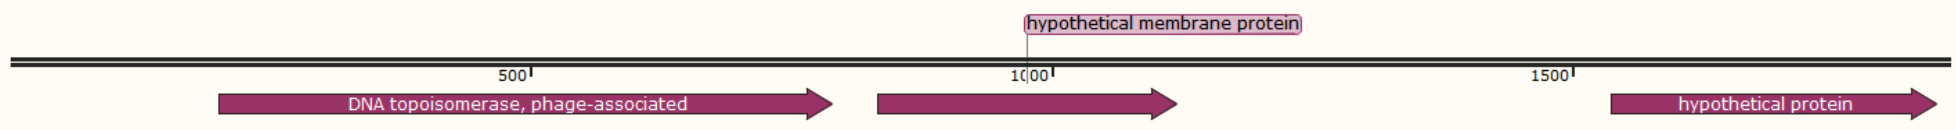

**scaffold-4**  
1861 bp

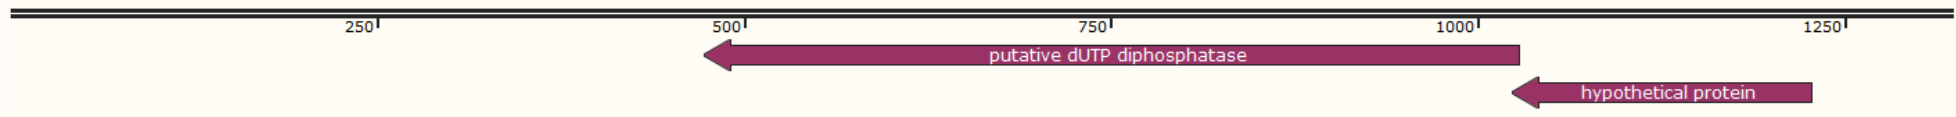

**scaffold-5**  
1322 bp

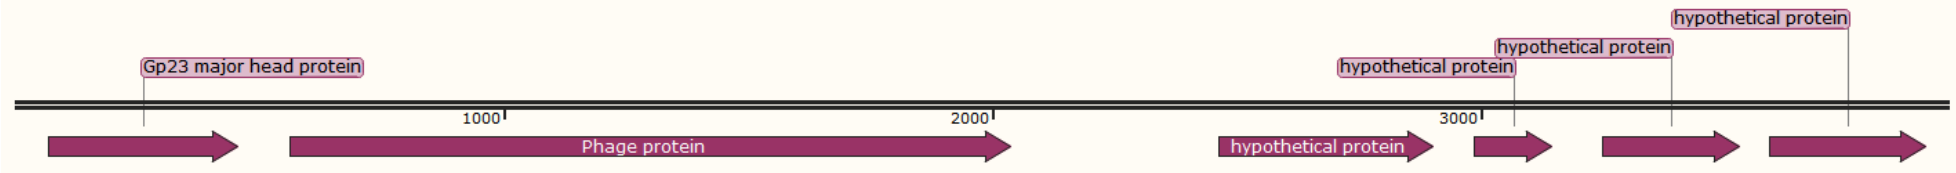

**scaffold-6**  
3954 bp

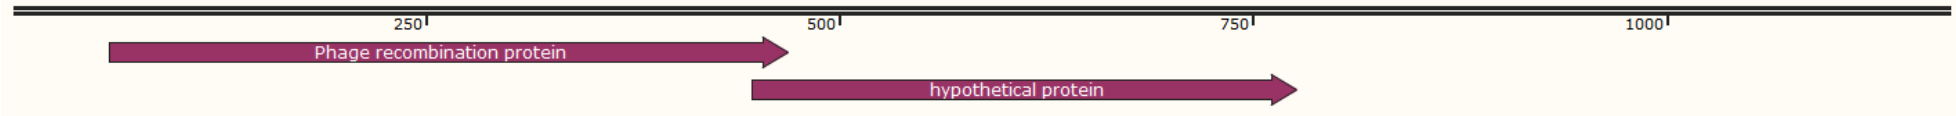

**scaffold-7**  
1170 bp

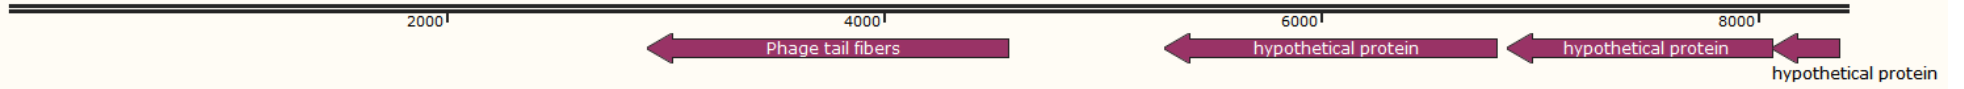

**scaffold-8**  
8407 bp

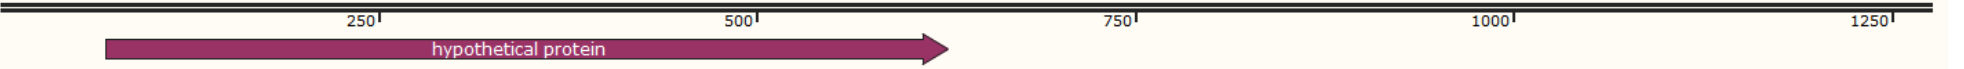

**scaffold-9**  
1275 bp

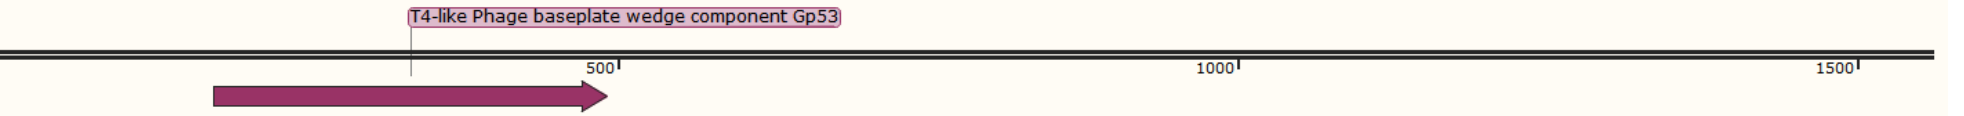

**scaffold-10**  
1559 bp

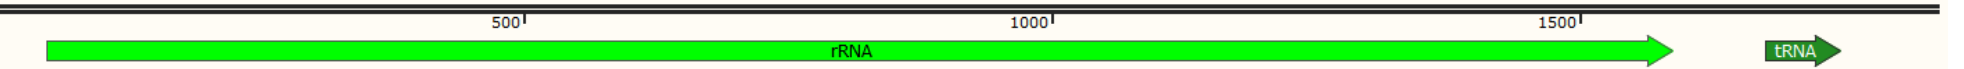

**scaffold-11**  
1838 bp



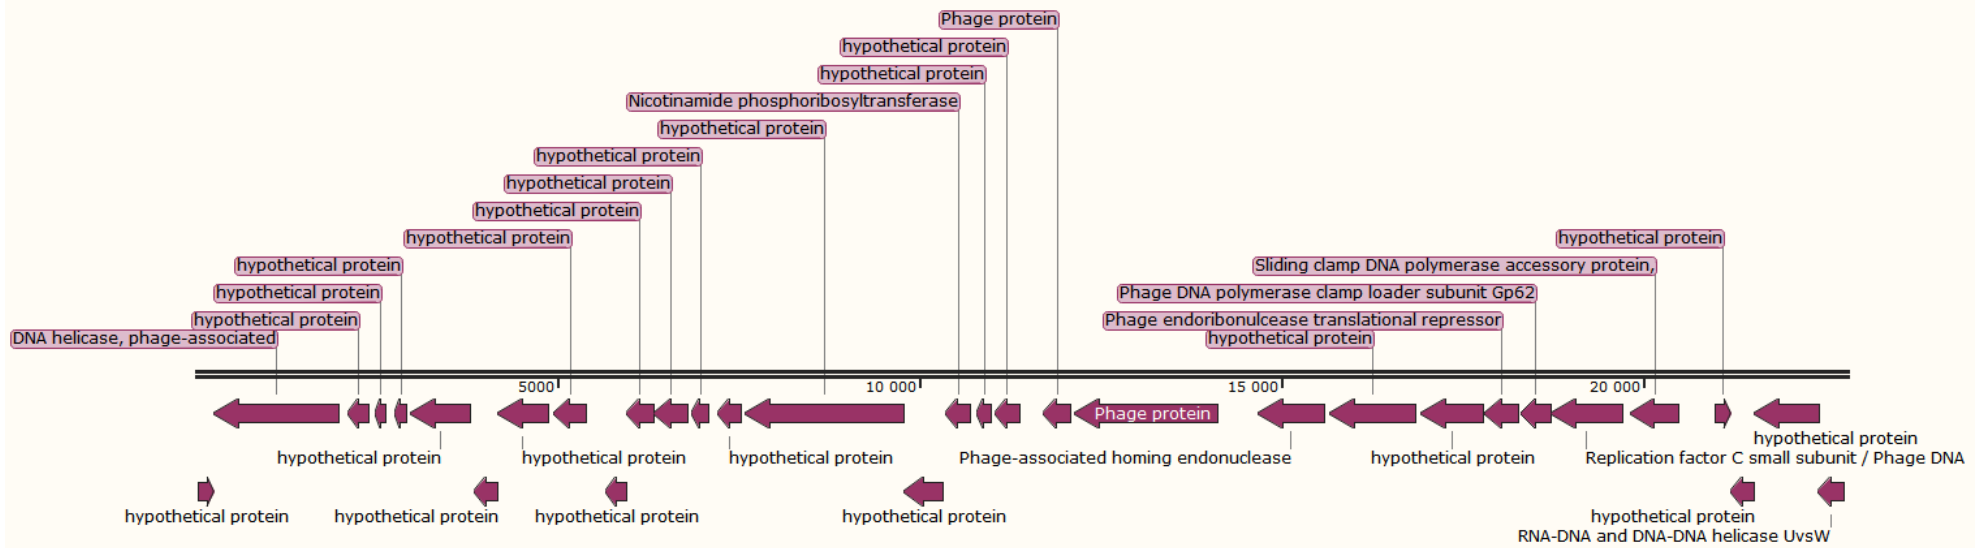

scaffold-14  
22 815 bp

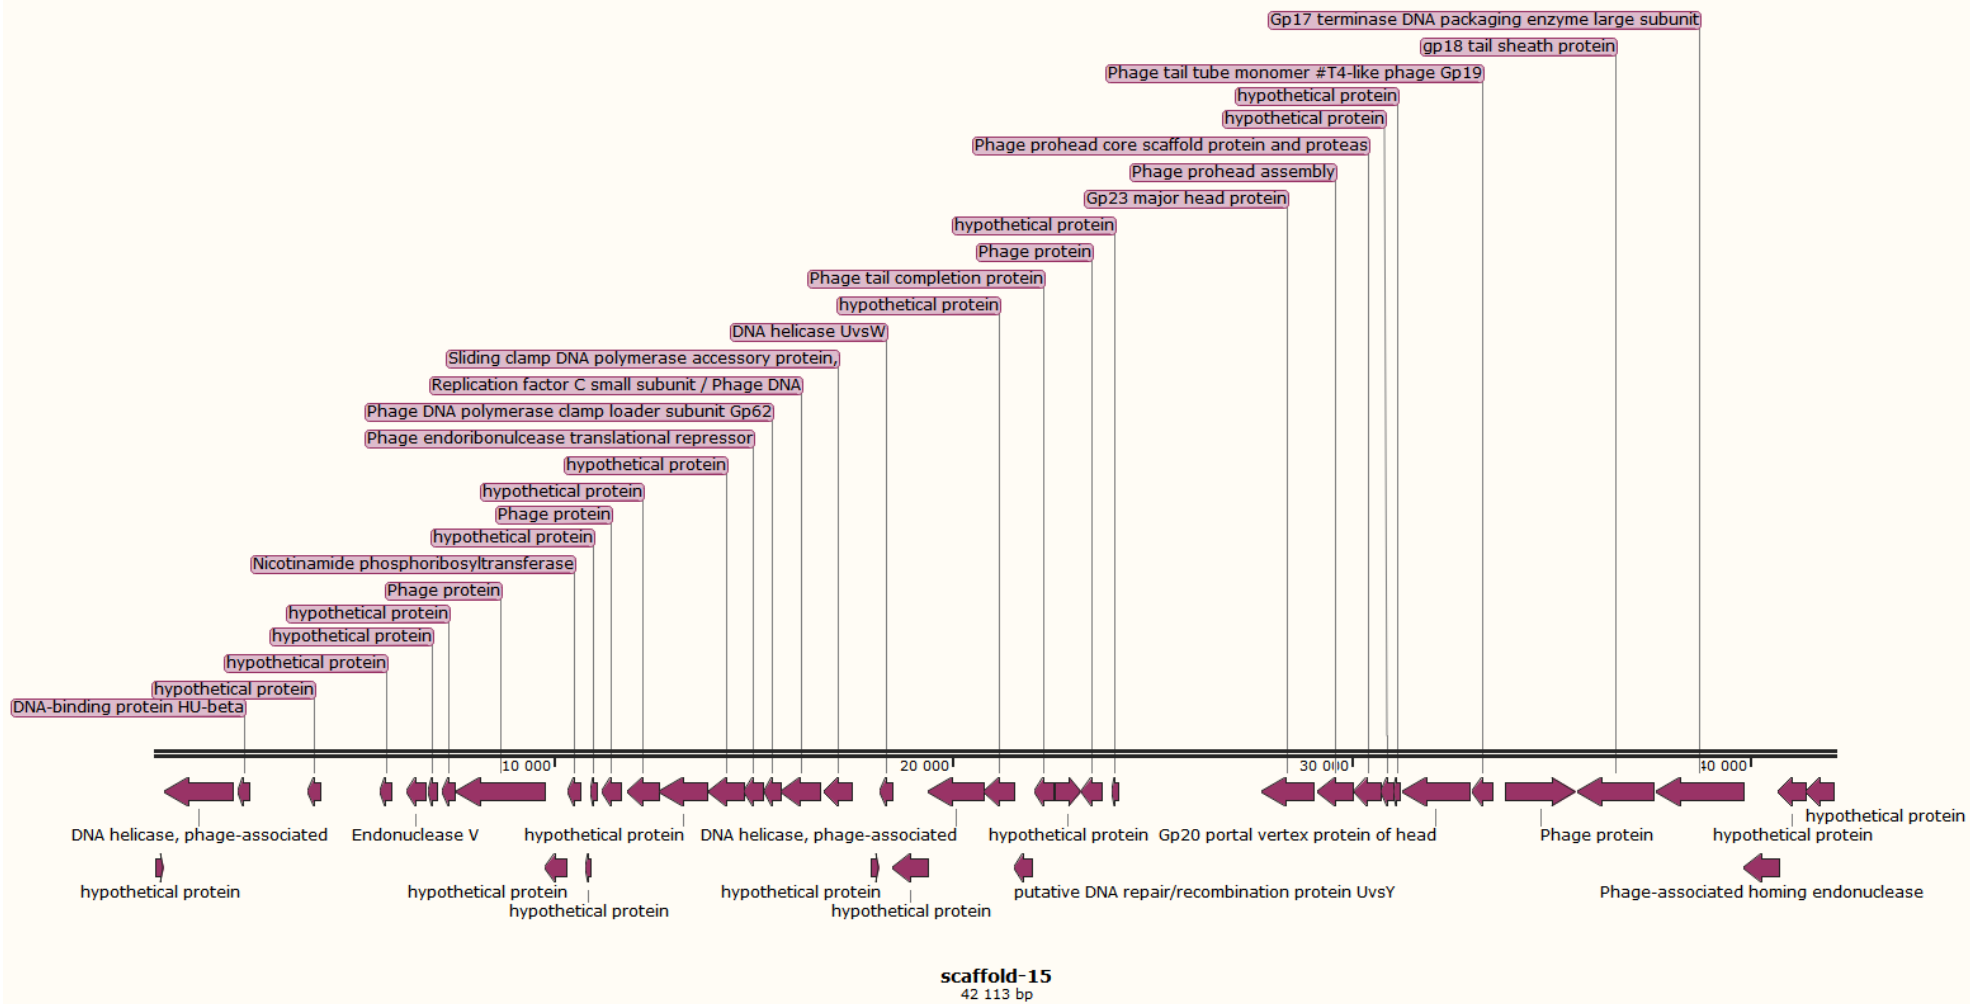

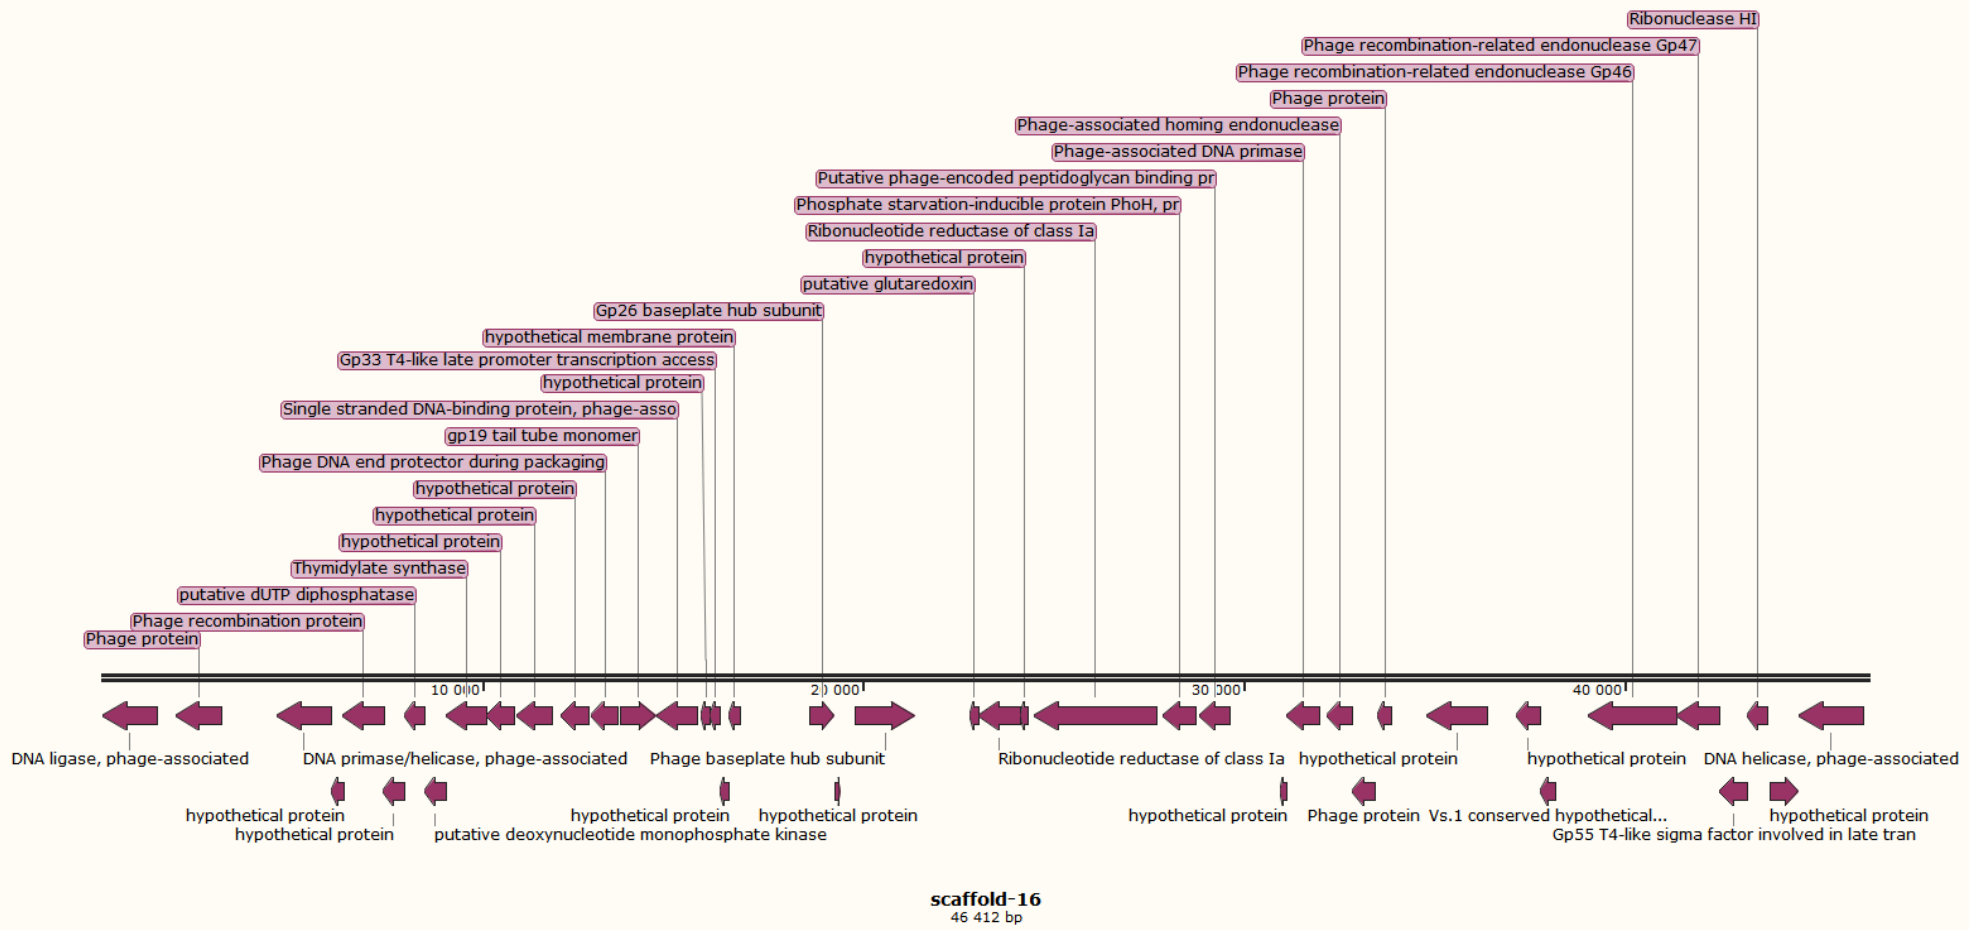

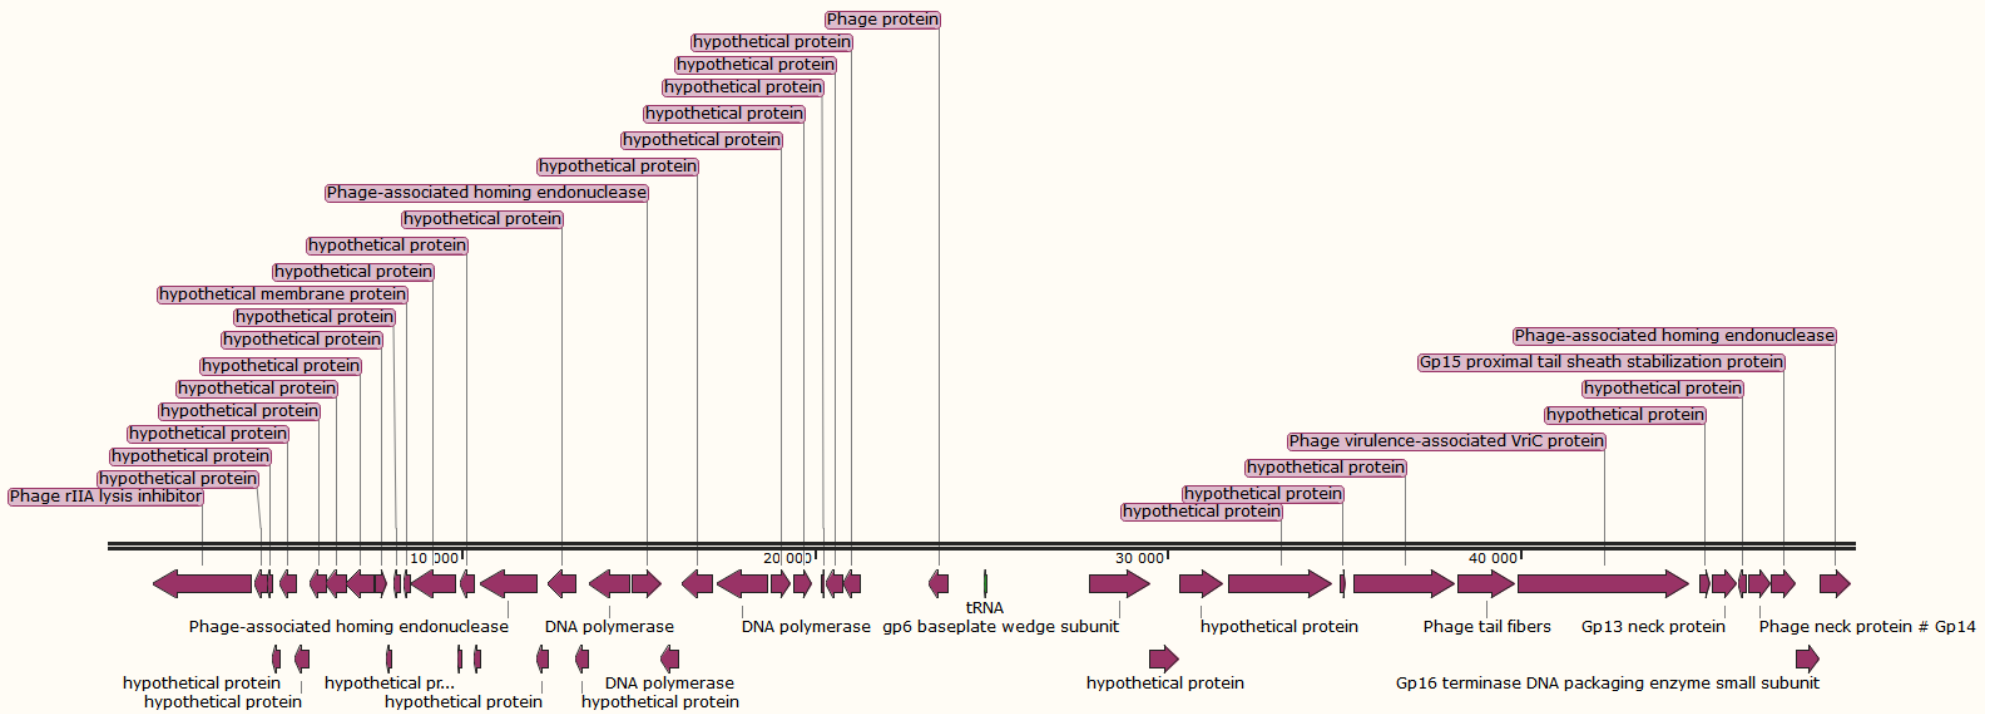

**scaffold-17**  
49 430 bp



Supplementary Figure 1.

B) The draft genome of bacteriophage  $\phi$ PD23.1

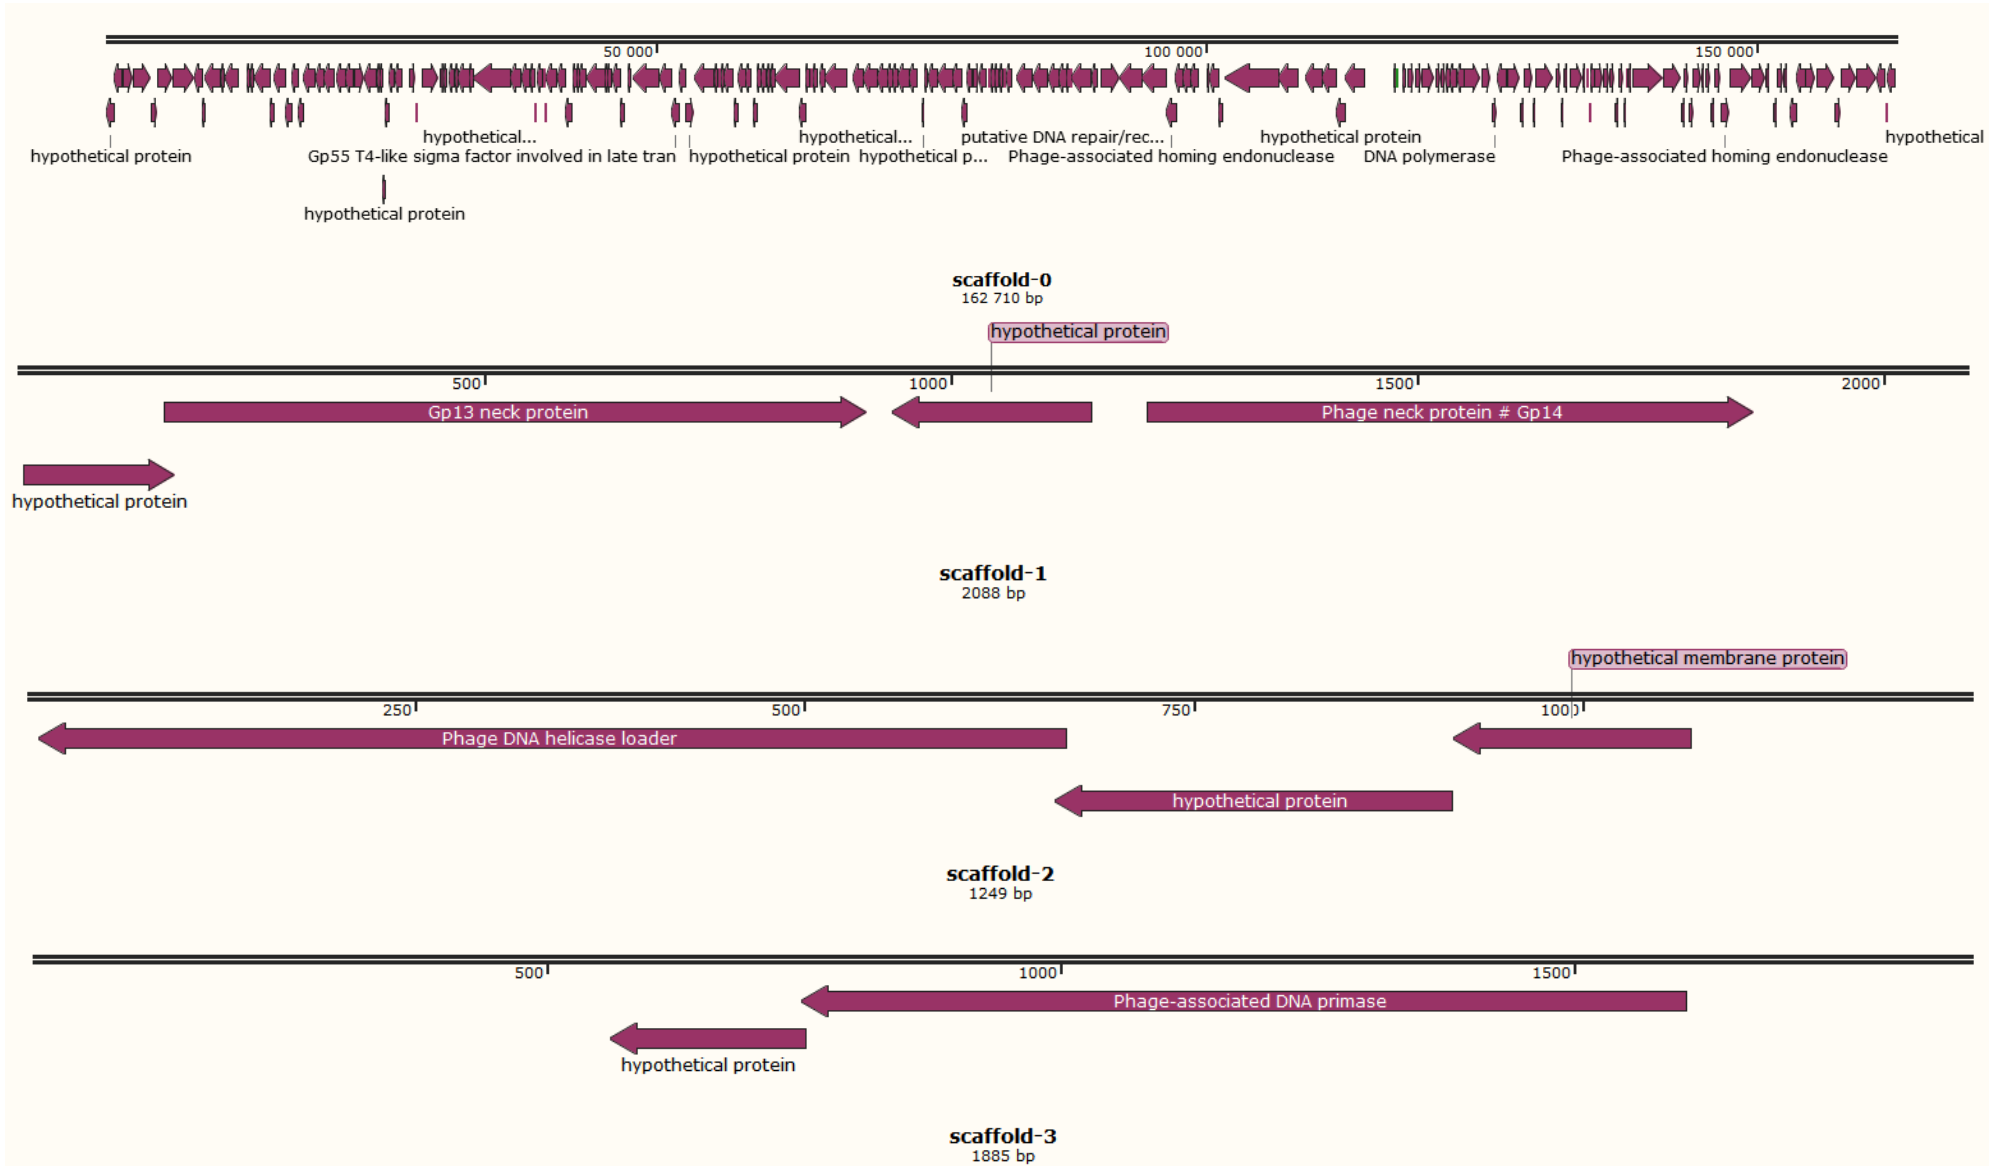

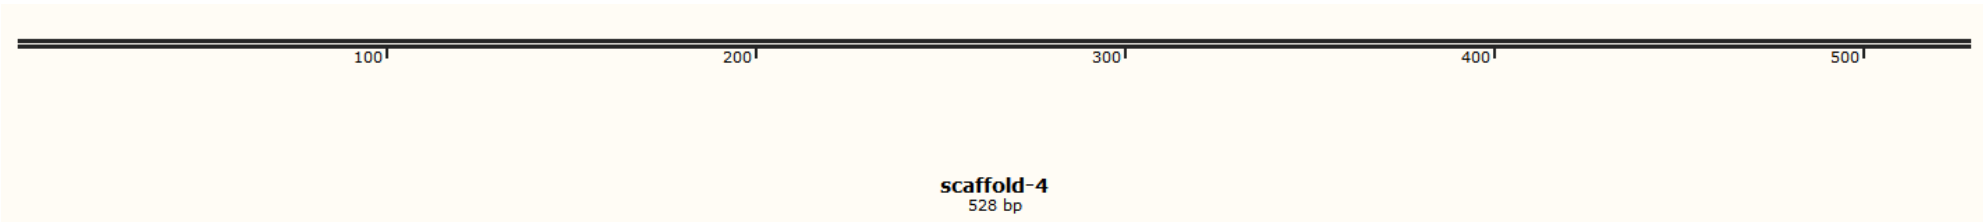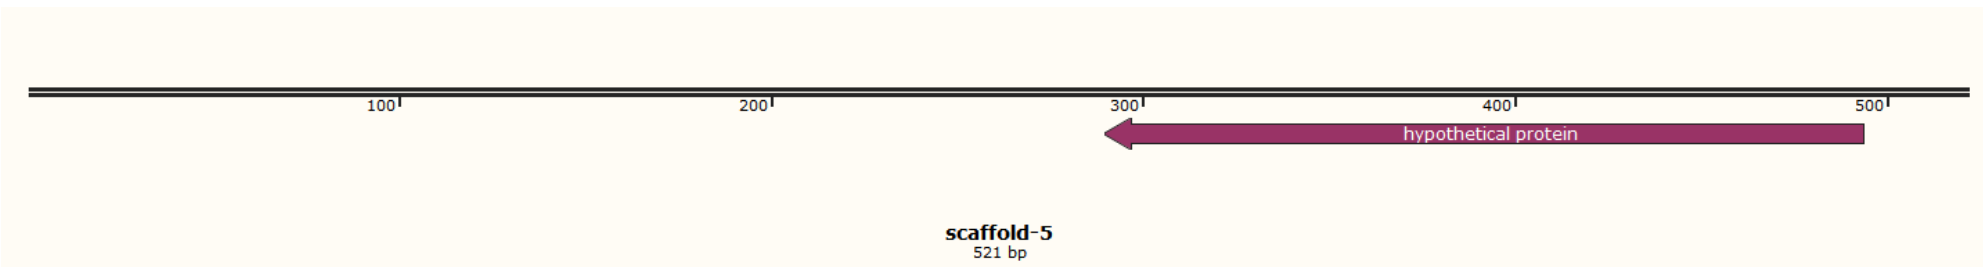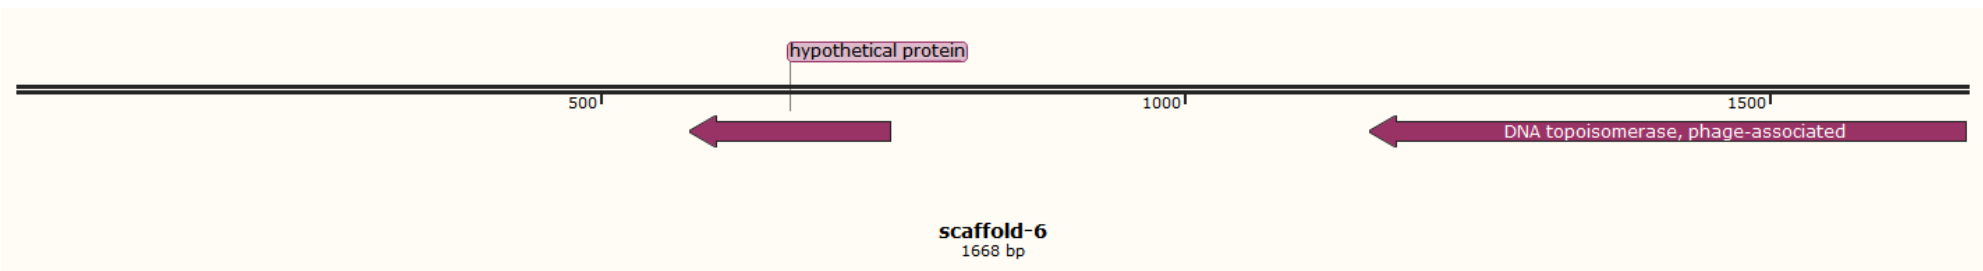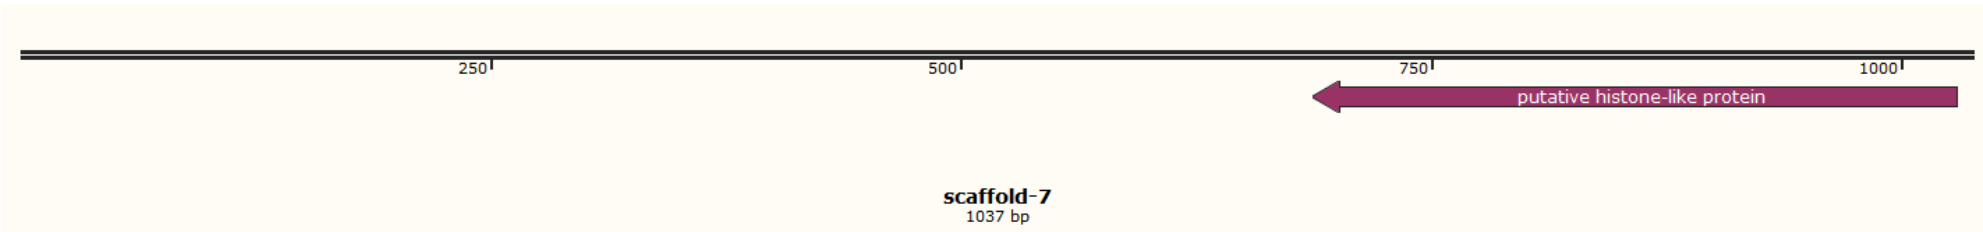

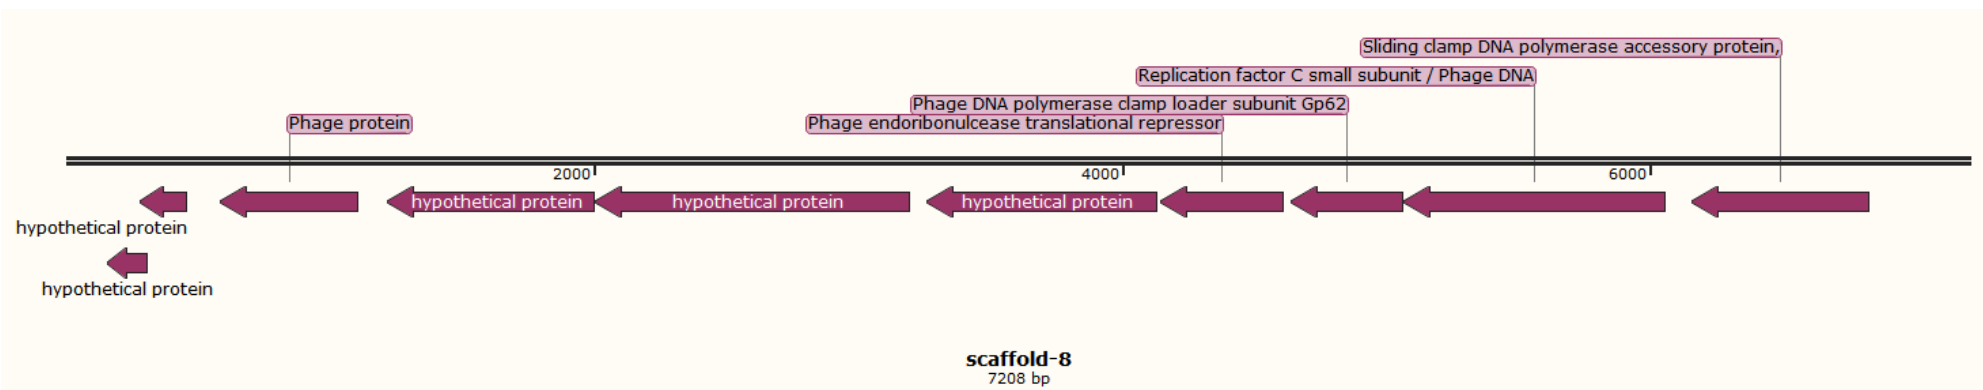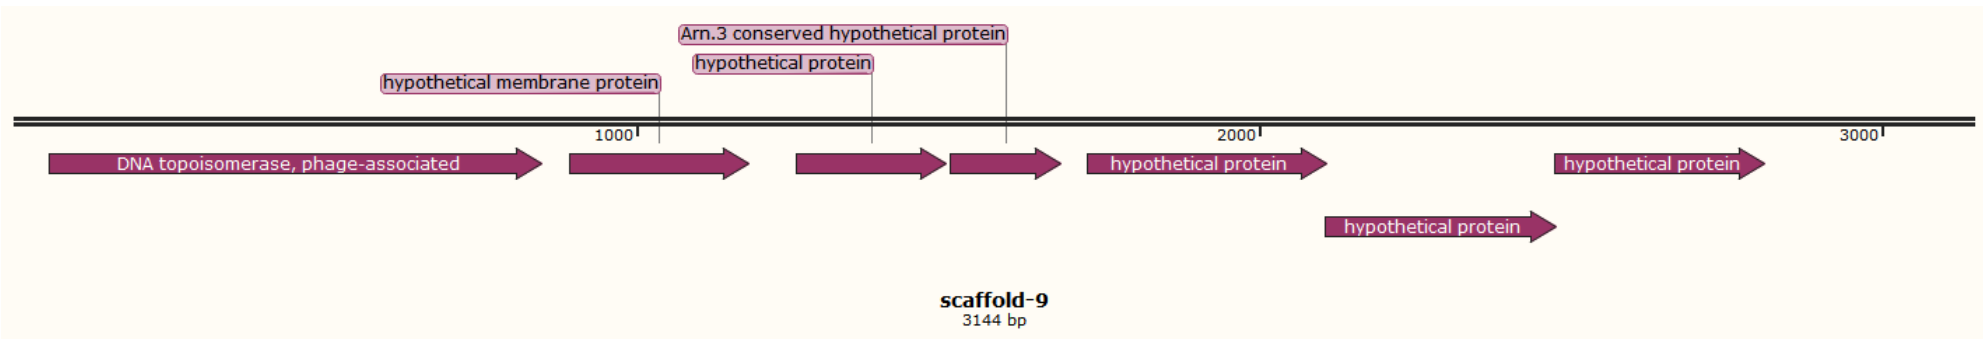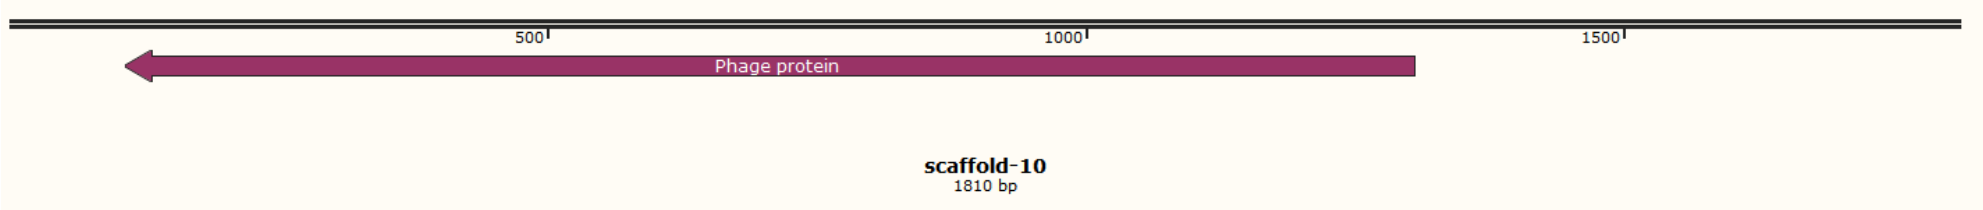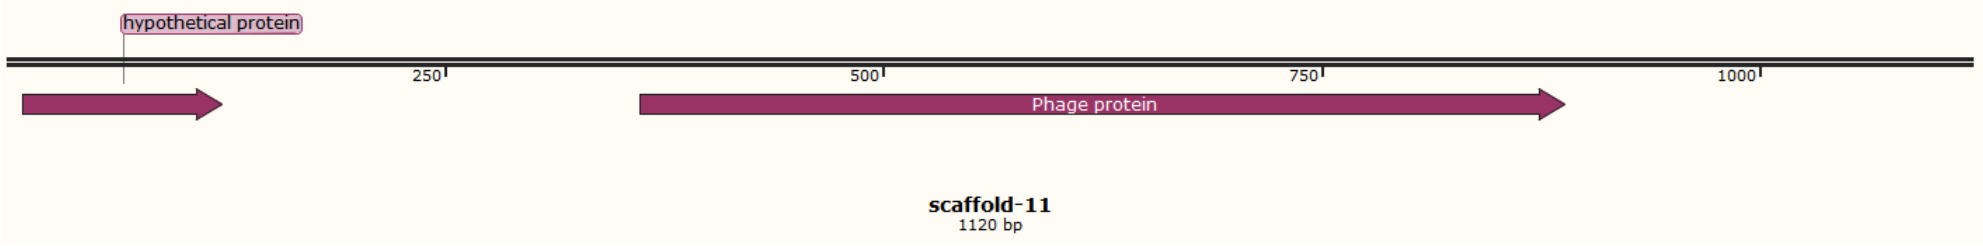

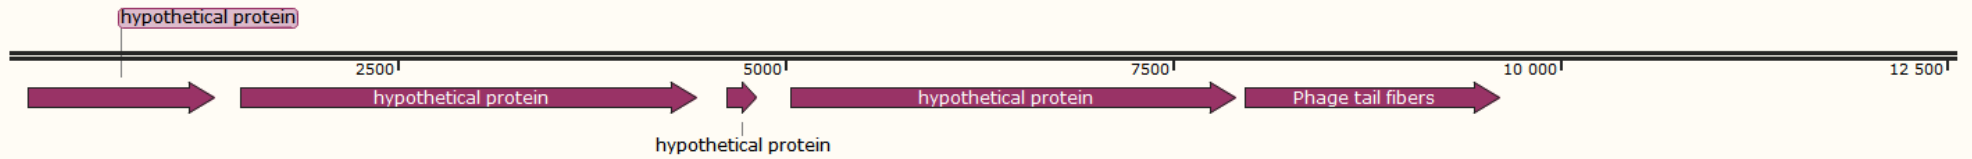

**scaffold-12**  
12 549 bp

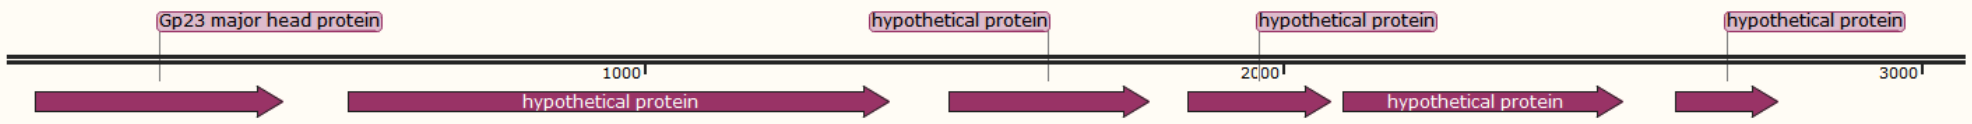

**scaffold-13**  
3065 bp

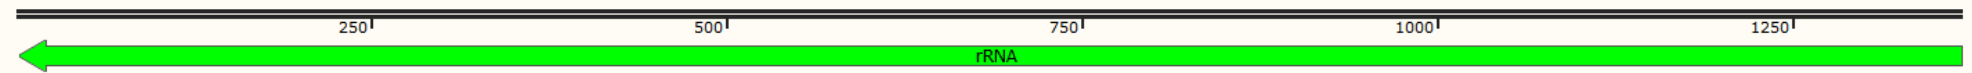

**scaffold-14**  
1367 bp

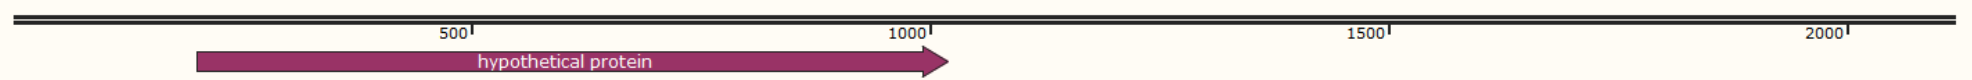

**scaffold-15**  
2115 bp
